# Supplementary material for: A novel splice variant of the protein tyrosine phosphatase PTPRJ that encodes for a soluble protein involved in angiogenesis
Source: PubMed Central journal article supplement (PMC5354644; doi:10.18632/oncotarget.14350), 2016-12-29
Supplement: oncotarget-08-10091-s001.pdf [file oncotarget-08-10091-s001.pdf]

## A novel splice variant of the protein tyrosine phosphatase *PTPRJ* that encodes for a soluble protein involved in angiogenesis

### SUPPLEMENTARY FIGURE

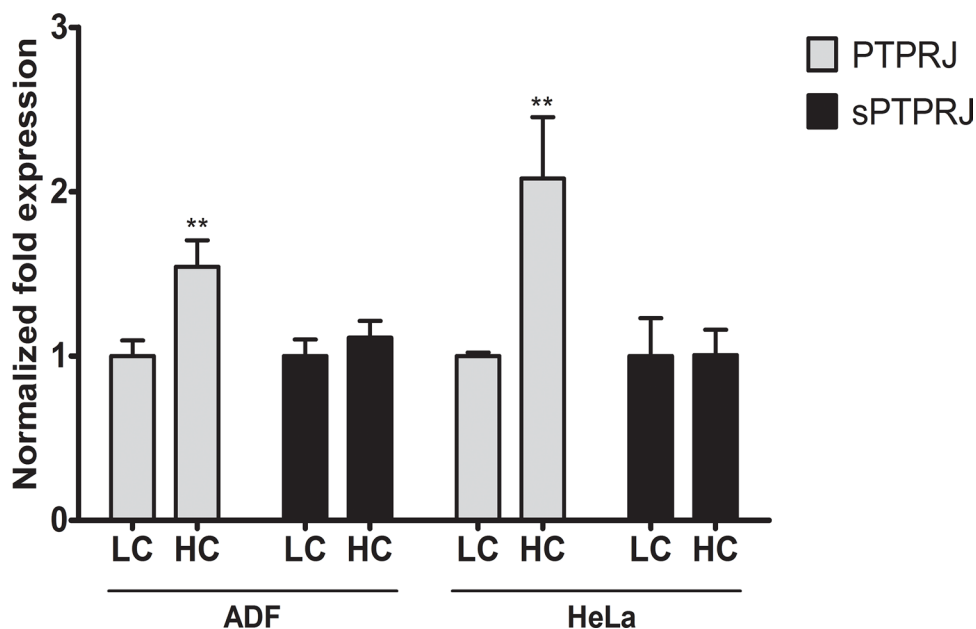

**Supplementary Figure 1: *sPTPRJ* mRNA level is not influenced by confluency of cells.** HeLa and ADF cells were grown and total RNA were then extracted from sparse (approximately 50 percent confluency) LC, and confluent cells, HC. Real-time PCR analysis of *PTPRJ* and *sPTPRJ* was performed and values were normalized to *HPRT* mRNA levels, represented as fold change  $\pm$  SD. Differences between groups were analyzed using unpaired two-tailed Student's *t*-test and P value are presented as  $\leq 0.01$  =\*\*.
